# Supplementary material for: A ferrocenyl-substituted 1,2,4-triazole ligand and its FeII, NiII and CuII 1D-chain complexes
Source: Royal Society of Chemistry journal article supplement (doi:10.1039/c3dt50384d), 2013-01-01
Supplement: c3dt50384d.pdf [file c3dt50384d.pdf]

Supplemental Section

S1: Single crystal analysis

Table S1: Selected bond lengths and angles for 1

| Bond lengths /Å     |            |
|---------------------|------------|
| C(8)-Fe(1)          | 2.039(2)   |
| C(9)-Fe(1)          | 2.041(2)   |
| C(10)-Fe(1)         | 2.042(2)   |
| C(11)-Fe(1)         | 2.039(2)   |
| C(12)-Fe(1)         | 2.039(2)   |
| C(13)-Fe(1)         | 2.018(3)   |
| C(14)-Fe(1)         | 2.033(3)   |
| C(15)-Fe(1)         | 2.050(3)   |
| C(16)-Fe(1)         | 2.038(3)   |
| C(17)-Fe(1)         | 2.033(3)   |
| Angles / °          |            |
| N6-C7-C8            | 110.7(2)   |
| C7-N6-N4            | 110.6(2)   |
| C7-C8-C9            | 123.9(2)   |
| C17-Fe1-C10         | 106.50(11) |
| Fe1-C8-C7           | 130.03(13) |
| Hydrogen Bonding /Å |            |
| N6(H)...N2          | 3.101(2)   |
| N2...C5(H)          | 3.378(7)   |
| Ligand torsion/°    |            |
| N4-N6-C7-C8         | 178.7      |

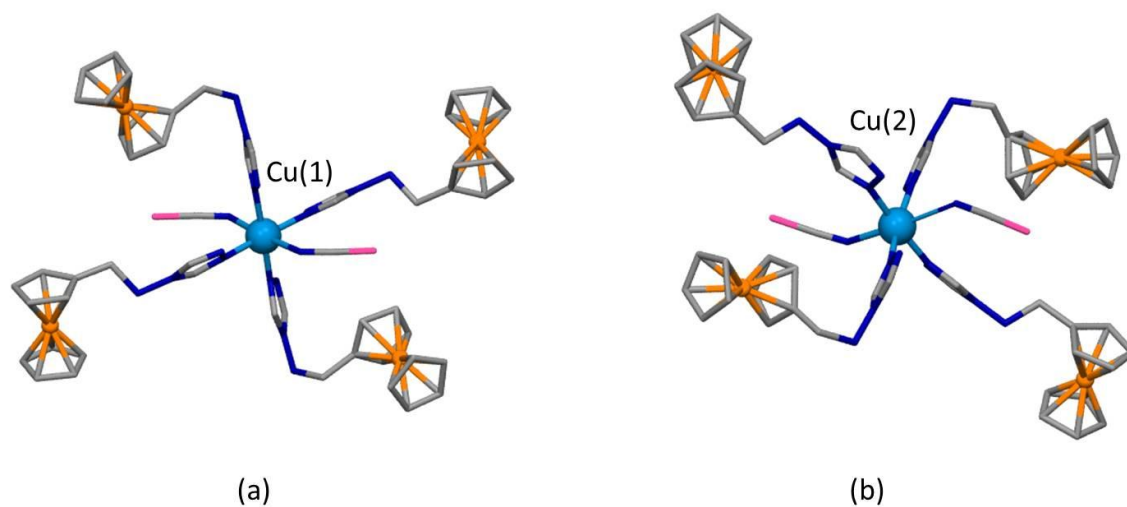

**Figure S1:** Comparison of the crystallographically distinct 1D chains in **5** containing either Cu(1) or Cu(2).

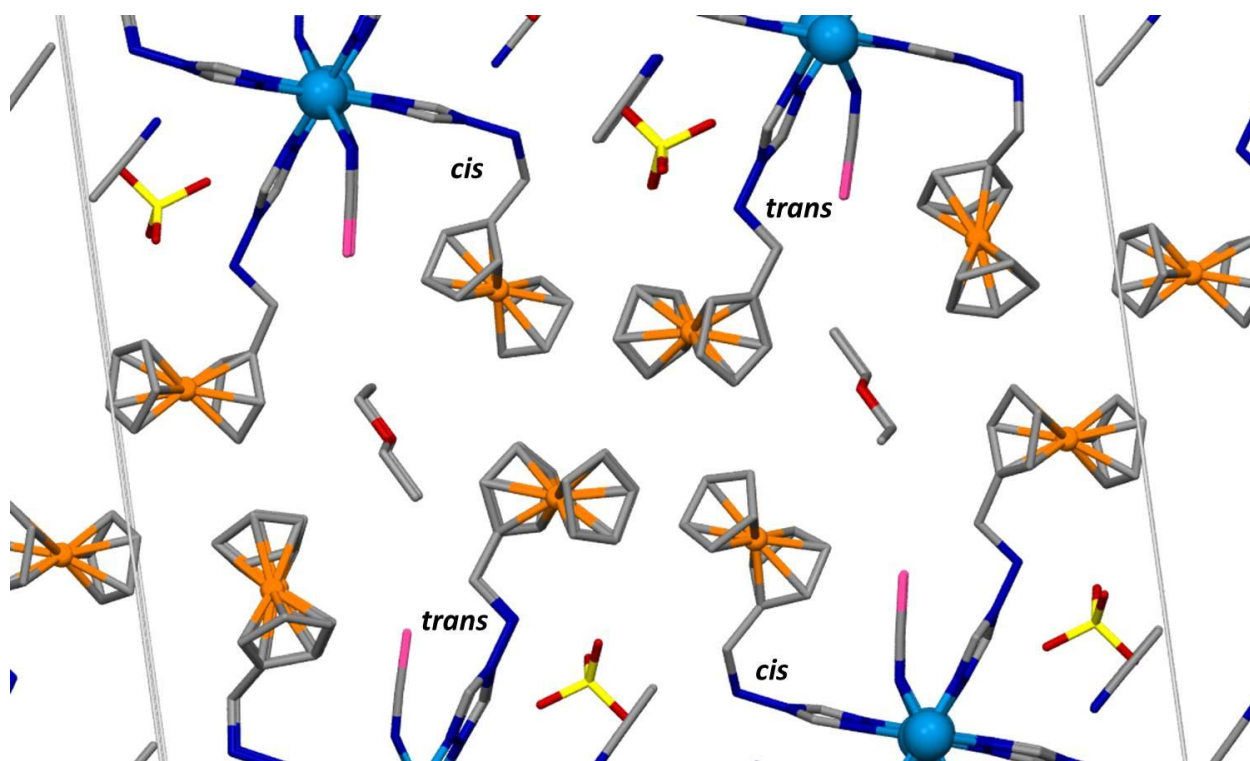

**Figure S2:** Image showing the *cis*- and *trans*-ATF ligands in **5** and their arrangement within the unit cell such that there are ferrocene rich areas between the chains. Viewed along the *b*-axis.

## S2: Magnetic Susceptibility

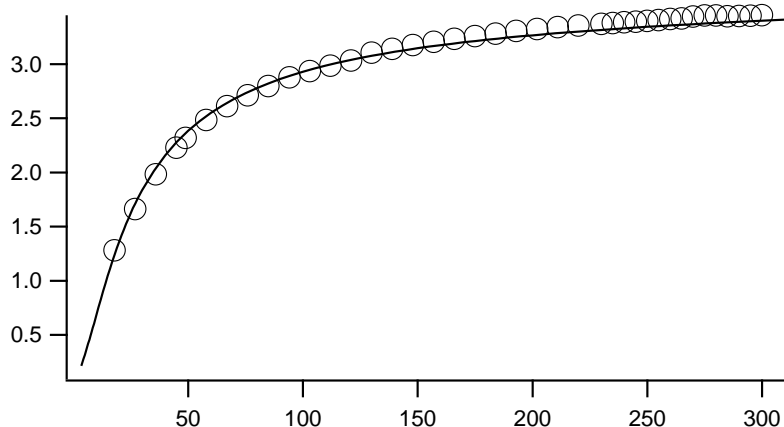

**Figure S3:** Plot of  $\chi_M T$  versus temperature (K) for  $[\text{Fe}(\text{ATF})_3] \cdot (\text{Br})_2 \cdot 0.5(\text{H}_2\text{O})$ , **2**. The solid line is the best fit to a 1D Heisenberg  $S = 2$  model (see text for parameter values).

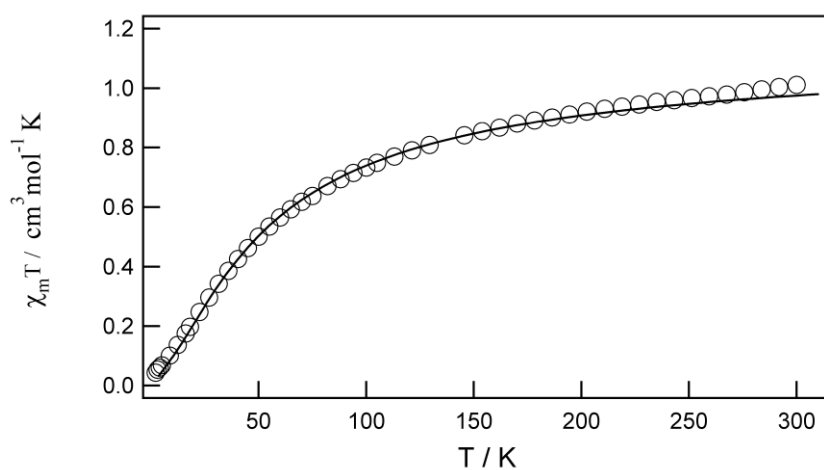

**Figure S4:** Plot of  $\chi_M T$  versus temperature for  $[\text{Ni}(\text{ATF})_3] \cdot (\text{ClO}_4)_2 \cdot 0.5(\text{H}_2\text{O})$ , **4**. The solid line is the best fit to a 1D Heisenberg  $S = 1$  model (see text).

### S5: Cyclic voltammetry

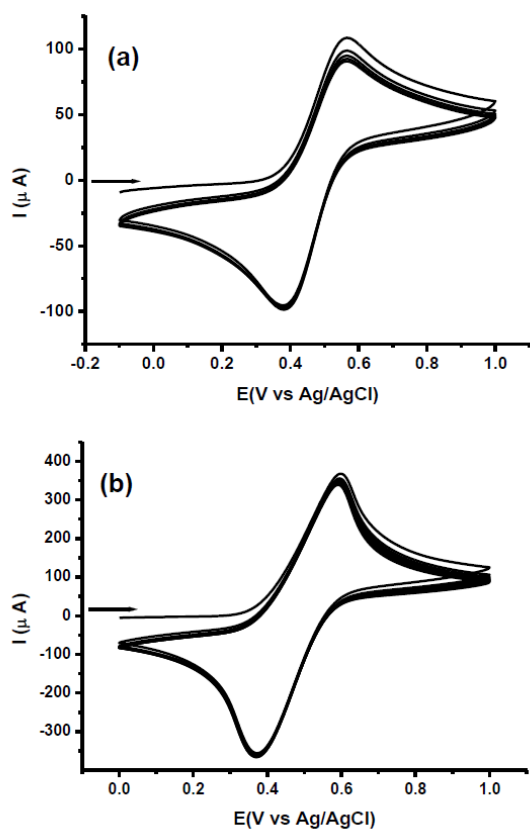

**Figure S5.** Multicyclic voltammograms obtained at scan rate of  $100 \text{ mV s}^{-1}$  for solid  $[\text{Fe}(\text{ATF})_3](\text{ClO}_4)_2 \cdot 0.5(\text{H}_2\text{O})$ , (a) and  $[\text{Ni}(\text{ATF})_3](\text{ClO}_4)_2 \cdot 0.5(\text{H}_2\text{O})$ , (b) mechanically attached to 1.5 mm diameter GC electrode when placed i
